# Supplementary material for: Pleiotropic, Unique and Shared Responses Elicited by IL-6 Family Cytokines in Human Vascular Endothelial Cells
Source: MDPI journal article supplement (doi:10.3390/ijms23031448), 2022-01-27
Supplement: s1 [file s1]

# Supplementary Materials

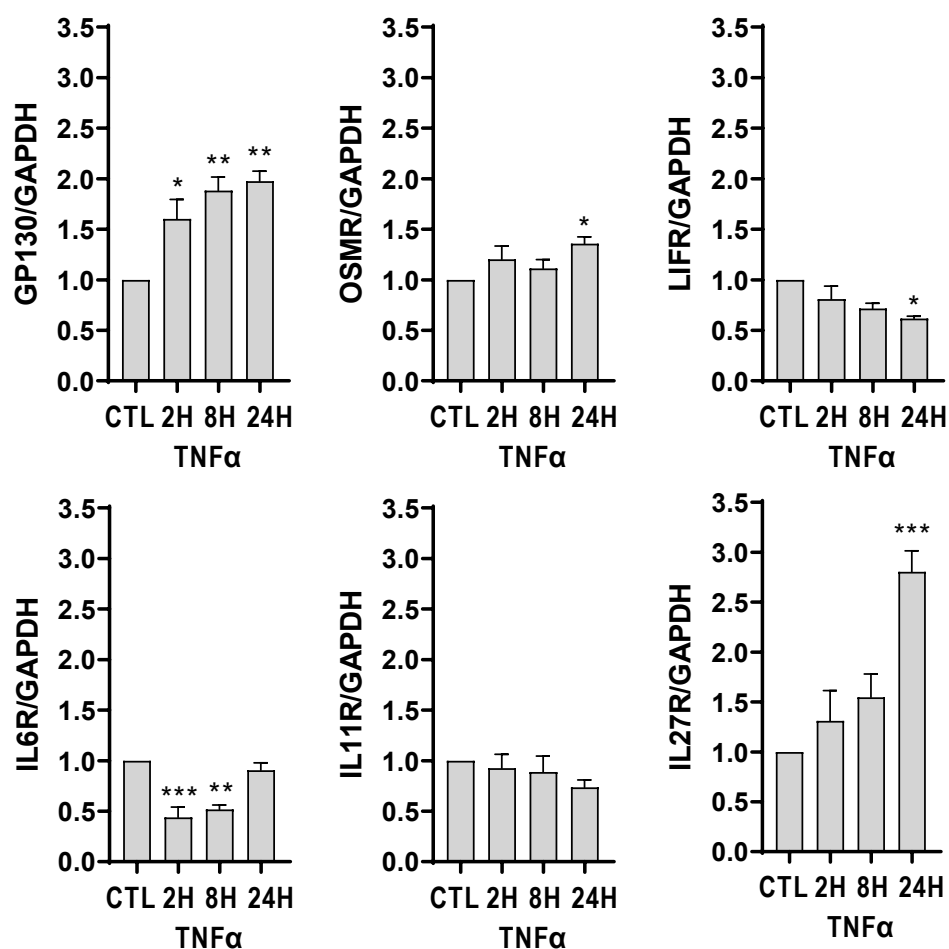

**Supplementary Figure S1.** Gene expression of IL6-family cytokine receptors in human endothelial cells after exposure to tumor necrosis factor alpha (TNFα). Human endothelial cells were exposed to TNFα 10ng/ml for 2-24 hours. Gene expression was analysed using Taqman quantitative PCR. Data was normalized to GAPDH, and untreated controls were set to 1. Data shown are mean ± SEM from 3 independent experiments run in duplicate. Statistical significance was calculated using One-way ANOVA followed by Dunnet's post hoc test. \* p < 0.05, \*\* p < 0.01, \*\*\* p < 0.001.

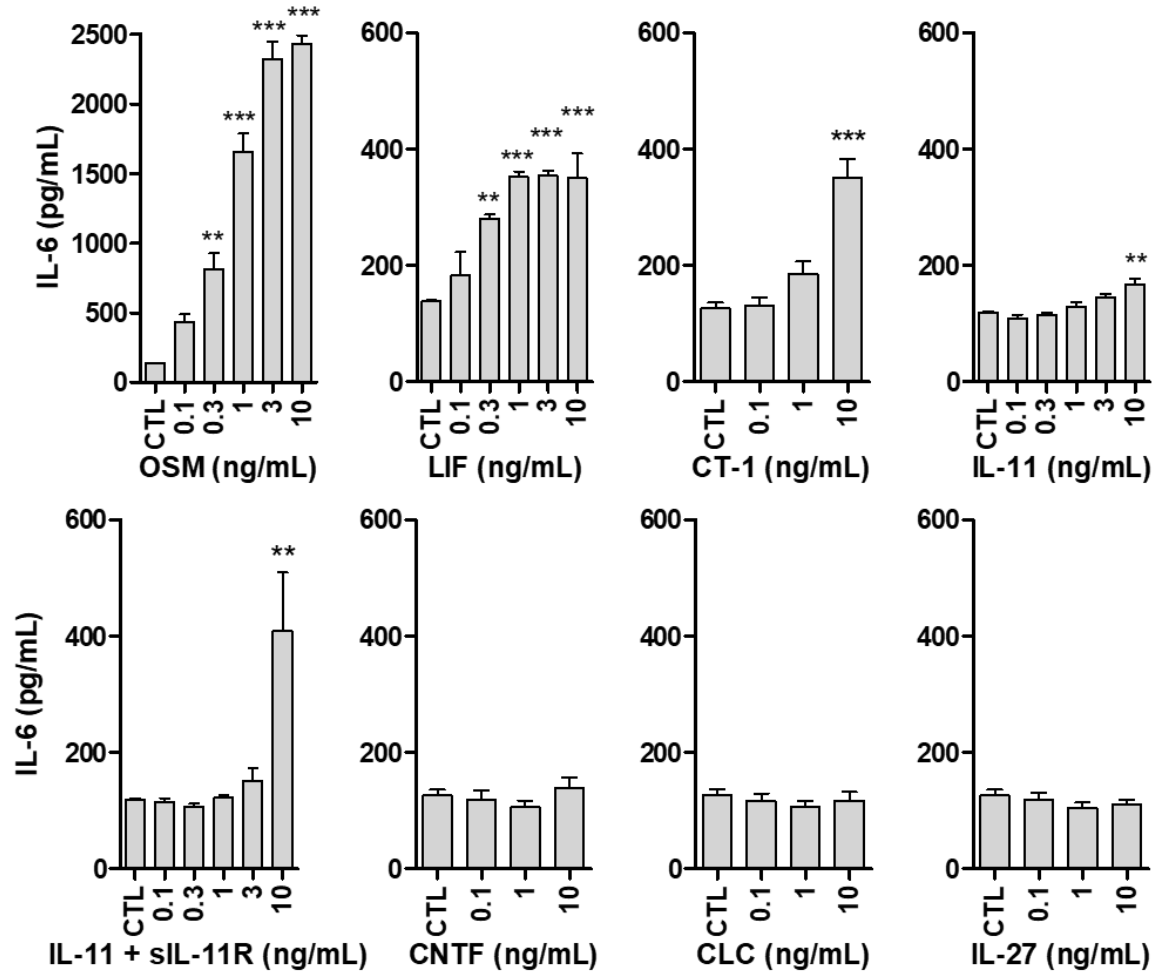

**Supplementary Figure S2.** Dose-response relationship of IL-6 family cytokines and release of interleukin-6 from human endothelial cells. Human endothelial cells were exposed to oncostatin M (OSM), leukemia inhibitory factor (LIF), cardiotrophin 1 (CT-1), interleukin-11 alone (IL-11) and in combination with soluble IL11-receptor (IL11 + R), ciliary neurotrophic factor (CNTF), cardiotrophin-like cytokine (CLC) or interleukin 27 for 48h. Release of IL6 was measured in cell supernatant using ELISA. Data shown are mean  $\pm$  SEM from 3 independent experiments run in duplicate. Statistical significance was calculated using One-way ANOVA followed by Dunnet's post hoc test. \*  $p < 0.05$ , \*\*  $p < 0.01$ , \*\*\*  $p < 0.001$ .

## Materials and Methods

### ELISA

Enzyme-linked immunosorbent assay (ELISA, DuoSet®, Bio-technique) was used to measure the release of IL-6 as a response to increasing concentration of OSM, LIF, CT-1, CLC, CNTF, IL-27, IL-11, sIL-11R. The analysis was performed according to the manufacturer's instructions. Absorbance was measured at 450nm using Cytation 3 imaging reader (BioTek, Winooski, VT, USA).

### Taqman primers/probes

| Taqman primer/probes |               |
|----------------------|---------------|
| CCL23                | Hs00270756_m1 |
| CNTFR                | Hs00181798_m1 |
| GAPDH                | Hs99999905_m1 |
| HGF                  | Hs00300159_m1 |
| IL11RA               | Hs00234415_m1 |
| IL27RA               | Hs00945029_m1 |
| IL6                  | Hs00174131_m1 |
| IL6R                 | Hs01075664_m1 |
| IL6ST (gp130)        | Hs00174360_m1 |
| LIFR                 | Hs01123581_m1 |
| OSMR                 | Hs00384276_m1 |
| SOCS3                | Hs02330328_m1 |
| STAT3                | Hs00374280_m1 |

Supplementary Table S1

|         | Uniprot ID | OSM  |      |       |       | LIF  |      |       |       | CT-1 |      |       |       | IL-6 + sIL6R |      |       |       | IL-11 + sIL11R |      |       |       | IL-6 |      |       |       | IL-11 |      |       |              | CNTF  |      |       |       | CLC   |      |       |       | IL-27 |      |       |       |
|---------|------------|------|------|-------|-------|------|------|-------|-------|------|------|-------|-------|--------------|------|-------|-------|----------------|------|-------|-------|------|------|-------|-------|-------|------|-------|--------------|-------|------|-------|-------|-------|------|-------|-------|-------|------|-------|-------|
|         |            | FC   | SD   | p     | FDR   | FC   | SD   | p     | FDR   | FC   | SD   | p     | FDR   | FC           | SD   | p     | FDR   | FC             | SD   | p     | FDR   | FC   | SD   | p     | FDR   | FC    | SD   | p     | FDR          | FC    | SD   | p     | FDR   | FC    | SD   | p     | FDR   |       |      |       |       |
| CCL23   | P55773     | 5.04 | 0.43 | 0.004 | 0.062 | 2.29 | 0.15 | 0.002 | 0.051 | 2.47 | 0.39 | 0.012 | 0.171 | 4.17         | 0.57 | 0.009 | 0.065 | 2.56           | 0.24 | 0.004 | 0.147 | 1.83 | 0.57 | 0.046 | 0.460 | 1.61  | 0.38 | 0.026 | 0.252        | 0.77  | 0.18 | 0.030 | 0.220 | -0.20 | 0.71 | 0.724 | 0.853 | 0.24  | 0.42 | 0.502 | 0.996 |
| HGF     | P14210     | 4.75 | 0.32 | 0.002 | 0.052 | 3.23 | 0.20 | 0.002 | 0.051 | 3.41 | 0.25 | 0.003 | 0.095 | 3.22         | 0.19 | 0.002 | 0.025 | 2.92           | 0.33 | 0.006 | 0.147 | 1.88 | 0.34 | 0.016 | 0.271 | 2.03  | 0.31 | 0.011 | 0.252        | 1.05  | 0.04 | 0.001 | 0.050 | -0.22 | 0.43 | 0.549 | 0.853 | 0.14  | 0.50 | 0.736 | 0.996 |
| IL6     | P05231     | 4.72 | 0.24 | 0.001 | 0.045 | 2.12 | 0.24 | 0.006 | 0.054 | 2.37 | 0.34 | 0.010 | 0.171 | -            | -    | -     | -     | 2.66           | 0.13 | 0.001 | 0.084 | -    | -    | -     | -     | 1.38  | 0.45 | 0.050 | 0.252        | 0.49  | 0.15 | 0.045 | 0.241 | -0.15 | 0.14 | 0.278 | 0.853 | 0.01  | 0.61 | 0.985 | 0.996 |
| TR-AP   | P13686     | 2.93 | 0.41 | 0.010 | 0.087 | 1.48 | 0.43 | 0.04  | 0.123 | 1.41 | 0.37 | 0.032 | 0.188 | 2.90         | 0.55 | 0.017 | 0.094 | 1.68           | 0.32 | 0.018 | 0.230 | 0.96 | 0.73 | 0.204 | 0.512 | 0.54  | 0.32 | 0.140 | 0.327        | 0.16  | 0.08 | 0.095 | 0.335 | -0.41 | 0.56 | 0.408 | 0.853 | -0.16 | 0.18 | 0.335 | 0.996 |
| MCP-1   | P13500     | 2.55 | 0.41 | 0.013 | 0.087 | 1.00 | 0.38 | 0.065 | 0.151 | 1.08 | 0.49 | 0.090 | 0.292 | 2.47         | 0.34 | 0.009 | 0.065 | 1.69           | 0.34 | 0.02  | 0.230 | 0.74 | 0.58 | 0.211 | 0.512 | 0.50  | 0.29 | 0.134 | 0.327        | -0.01 | 0.33 | 0.957 | 0.981 | -0.23 | 0.52 | 0.596 | 0.853 | -0.13 | 0.44 | 0.711 | 0.996 |
| CXCL11  | O14625     | 1.96 | 0.54 | 0.035 | 0.130 | 1.34 | 0.43 | 0.047 | 0.123 | 1.54 | 0.37 | 0.028 | 0.185 | 1.45         | 0.46 | 0.048 | 0.136 | 1.07           | 0.60 | 0.129 | 0.325 | 0.97 | 0.15 | 0.012 | 0.271 | 1.43  | 0.10 | 0.003 | 0.176        | 0.83  | 0.39 | 0.094 | 0.335 | 0.10  | 0.56 | 0.834 | 0.871 | 0.58  | 0.36 | 0.148 | 0.996 |
| CXCL5   | P42830     | 1.88 | 0.38 | 0.020 | 0.100 | 0.74 | 0.23 | 0.046 | 0.123 | 0.92 | 0.46 | 0.105 | 0.304 | 1.81         | 0.42 | 0.026 | 0.124 | 0.8            | 0.38 | 0.095 | 0.325 | 0.73 | 0.16 | 0.022 | 0.271 | 0.79  | 0.37 | 0.096 | 0.308        | 0.18  | 0.15 | 0.236 | 0.636 | -0.09 | 0.43 | 0.784 | 0.853 | 0.28  | 0.24 | 0.237 | 0.996 |
| MCP-3   | P80098     | 1.77 | 0.32 | 0.016 | 0.087 | 1.22 | 0.20 | 0.014 | 0.079 | 1.40 | 0.33 | 0.027 | 0.185 | 1.72         | 0.22 | 0.008 | 0.065 | 1.33           | 0.35 | 0.033 | 0.298 | 0.72 | 0.16 | 0.023 | 0.271 | 1.21  | 0.33 | 0.035 | 0.252        | 0.40  | 0.06 | 0.012 | 0.166 | -0.14 | 0.30 | 0.58  | 0.853 | -0.02 | 0.47 | 0.948 | 0.996 |
| MCP-2   | P80075     | 1.64 | 0.43 | 0.033 | 0.129 | 0.87 | 0.45 | 0.114 | 0.215 | 0.83 | 0.45 | 0.120 | 0.304 | 1.19         | 0.47 | 0.070 | 0.160 | 0.61           | 0.40 | 0.165 | 0.377 | 0.39 | 0.30 | 0.206 | 0.512 | 0.67  | 0.27 | 0.073 | 0.299        | 0.22  | 0.09 | 0.078 | 0.335 | -0.12 | 0.40 | 0.72  | 0.853 | 0.19  | 0.27 | 0.427 | 0.996 |
| TRAIL   | P50591     | 1.56 | 0.24 | 0.011 | 0.087 | 0.84 | 0.09 | 0.005 | 0.054 | 1.05 | 0.24 | 0.026 | 0.185 | 1.46         | 0.36 | 0.029 | 0.124 | 0.81           | 0.26 | 0.047 | 0.298 | 0.66 | 0.36 | 0.122 | 0.512 | 0.91  | 0.32 | 0.058 | 0.253        | 0.31  | 0.10 | 0.045 | 0.241 | -0.23 | 0.48 | 0.568 | 0.853 | 0.19  | 0.27 | 0.437 | 0.996 |
| OPG     | O00300     | 1.34 | 0.47 | 0.058 | 0.171 | 0.88 | 0.13 | 0.01  | 0.075 | 0.92 | 0.23 | 0.029 | 0.185 | 1.09         | 0.33 | 0.043 | 0.136 | 0.68           | 0.32 | 0.099 | 0.325 | 0.51 | 0.25 | 0.103 | 0.512 | 1.09  | 0.31 | 0.038 | 0.252        | 0.32  | 0.08 | 0.029 | 0.215 | -0.23 | 0.36 | 0.466 | 0.853 | 0.13  | 0.53 | 0.769 | 0.996 |
| CSF-1   | P09603     | 0.94 | 0.20 | 0.021 | 0.100 | 1.09 | 0.18 | 0.013 | 0.079 | 1.17 | 0.18 | 0.012 | 0.171 | 0.92         | 0.25 | 0.036 | 0.136 | 0.92           | 0.34 | 0.062 | 0.325 | 0.47 | 0.30 | 0.158 | 0.512 | 1.19  | 0.25 | 0.021 | 0.252        | 0.46  | 0.06 | 0.008 | 0.148 | -0.20 | 0.36 | 0.506 | 0.853 | 0.18  | 0.45 | 0.625 | 0.996 |
| TWEAK   | O43508     | 0.91 | 0.36 | 0.069 | 0.171 | 0.69 | 0.13 | 0.016 | 0.089 | 0.80 | 0.04 | 0.002 | 0.095 | 0.81         | 0.42 | 0.114 | 0.195 | 0.62           | 0.32 | 0.114 | 0.325 | 0.48 | 0.40 | 0.231 | 0.512 | 1.08  | 0.37 | 0.054 | 0.252        | 0.32  | 0.14 | 0.087 | 0.335 | -0.17 | 0.46 | 0.647 | 0.853 | 0.08  | 0.65 | 0.874 | 0.996 |
| IGFBP-1 | P08833     | 0.66 | 0.17 | 0.032 | 0.129 | 0.37 | 0.14 | 0.063 | 0.151 | 0.35 | 0.19 | 0.121 | 0.304 | 1.30         | 0.32 | 0.03  | 0.124 | 0.48           | 0.15 | 0.045 | 0.298 | 0.46 | 0.30 | 0.160 | 0.512 | 0.33  | 0.20 | 0.145 | 0.327        | 0.05  | 0.35 | 0.857 | 0.981 | -0.17 | 0.35 | 0.569 | 0.853 | -0.06 | 0.26 | 0.788 | 0.996 |
| CCL15   | Q16663     | 0.60 | 0.15 | 0.028 | 0.123 | 0.23 | 0.13 | 0.138 | 0.242 | 0.10 | 0.20 | 0.539 | 0.648 | 1.13         | 0.44 | 0.068 | 0.160 | 0.26           | 0.14 | 0.118 | 0.325 | 0.37 | 0.06 | 0.012 | 0.271 | 0.08  | 0.12 | 0.474 | 0.593        | -0.01 | 0.05 | 0.760 | 0.981 | -0.09 | 0.06 | 0.176 | 0.853 | -0.07 | 0.05 | 0.226 | 0.996 |
| IL-18R1 | Q13478     | 0.58 | 0.32 | 0.122 | 0.249 | 0.63 | 0.12 | 0.019 | 0.091 | 0.74 | 0.23 | 0.043 | 0.233 | 0.61         | 0.30 | 0.102 | 0.193 | 0.45           | 0.30 | 0.171 | 0.377 | 0.4  | 0.27 | 0.165 | 0.512 | 0.93  | 0.31 | 0.052 | 0.252        | 0.20  | 0.12 | 0.140 | 0.446 | -0.22 | 0.17 | 0.202 | 0.853 | 0.02  | 0.54 | 0.971 | 0.996 |
| CXCL16  | Q9H2A7     | 0.51 | 0.05 | 0.005 | 0.067 | 0.28 | 0.06 | 0.02  | 0.091 | 0.27 | 0.12 | 0.085 | 0.292 | 1.01         | 0.32 | 0.047 | 0.136 | 0.34           | 0.09 | 0.036 | 0.298 | 0.4  | 0.29 | 0.197 | 0.512 | 0.25  | 0.12 | 0.100 | 0.308        | 0.12  | 0.38 | 0.711 | 0.981 | -0.18 | 0.48 | 0.641 | 0.853 | -0.02 | 0.28 | 0.940 | 0.996 |
| CXCL6   | P80162     | 0.50 | 0.27 | 0.119 | 0.249 | 0.60 | 0.44 | 0.194 | 0.309 | 0.77 | 0.66 | 0.238 | 0.462 | 0.56         | 0.38 | 0.174 | 0.249 | 0.31           | 0.83 | 0.65  | 0.785 | 0.33 | 0.16 | 0.096 | 0.512 | 1.04  | 0.51 | 0.101 | <b>0.308</b> | 0.23  | 0.17 | 0.193 | 0.563 | 0.08  | 0.37 | 0.792 | 0.853 | 0.44  | 0.26 | 0.137 | 0.996 |
| IGFBP-7 | Q16270     | 0.48 | 0.32 | 0.163 | 0.292 | 0.59 | 0.15 | 0.03  | 0.118 | 0.54 | 0.19 | 0.054 | 0.250 | 1.59         | 0.40 | 0.03  | 0.124 | 0.78           | 0.24 | 0.046 | 0.298 | 0.74 | 0.57 | 0.209 | 0.512 | 0.55  | 0.56 | 0.300 | 0.482        | 0.09  | 0.56 | 0.842 | 0.981 | -0.35 | 0.83 | 0.612 | 0.853 | -0.08 | 0.62 | 0.871 | 0.996 |
| CDCP1   | Q9H5V8     | 0.44 | 0.44 | 0.293 | 0.428 | 0.54 | 0.05 | 0.004 | 0.054 | 0.67 | 0.15 | 0.024 | 0.185 | 0.32         | 0.06 | 0.017 | 0.094 | 0.39           | 0.22 | 0.127 | 0.325 | 0.25 | 0.16 | 0.155 | 0.512 | 0.90  | 0.42 | 0.096 | 0.308        | 0.24  | 0.24 | 0.289 | 0.750 | -0.15 | 0.19 | 0.37  | 0.853 | 0.06  | 0.37 | 0.848 | 0.996 |
| Fit3L   | P49771     | 0.42 | 0.40 | 0.281 | 0.425 | 0.42 | 0.11 | 0.033 | 0.121 | 0.51 | 0.23 | 0.092 | 0.292 | 0.53         | 0.23 | 0.081 | 0.163 | 0.38           | 0.13 | 0.058 | 0.325 | 0.29 | 0.21 | 0.185 | 0.512 | 0.93  | 0.49 | 0.116 | 0.327        | 0.42  | 0.11 | 0.031 | 0.215 | -0.11 | 0.30 | 0.67  | 0.853 | 0.16  | 0.62 | 0.752 | 0.996 |
| TFPI    | P10646     | 0.40 | 0.26 | 0.161 | 0.292 | 0.51 | 0.11 | 0.022 | 0.095 | 0.50 | 0.21 | 0.081 | 0.292 | 1.12         | 0.38 | 0.053 | 0.144 | 0.67           | 0.28 | 0.077 | 0.325 | 0.56 | 0.44 | 0.209 | 0.512 | 0.46  | 0.41 | 0.254 | 0.479        | 0.09  | 0.44 | 0.800 | 0.981 | -0.35 | 0.76 | 0.578 | 0.853 | 0.01  | 0.49 | 0.975 | 0.996 |
| IL-18BP | O95998     | 0.35 | 0.14 | 0.072 | 0.171 | 0.13 | 0.16 | 0.389 | 0.484 | 0.21 | 0.18 | 0.239 | 0.462 | 0.76         | 0.30 | 0.069 | 0.160 | 0.29           | 0.05 | 0.017 | 0.230 | 0.35 | 0.25 | 0.191 | 0.512 | 0.05  | 0.05 | 0.276 | 0.482        | -0.13 | 0.31 | 0.622 | 0.981 | -0.17 | 0.36 | 0.563 | 0.853 | -0.11 | 0.25 | 0.606 | 0.996 |
| CXCL1   | P09341     | 0.29 | 0.47 | 0.478 | 0.587 | 0.37 | 0.15 | 0.072 | 0.157 | 0.27 | 0.21 | 0.212 | 0.436 | 0.43         | 0.26 | 0.149 | 0.232 | 0.2            | 0.28 | 0.430 | 0.636 | 0.15 | 0.13 | 0.234 | 0.512 | 0.67  | 0.29 | 0.085 | 0.308        | 0.08  | 0.01 | 0.014 | 0.166 | -0.06 | 0.20 | 0.735 | 0.853 | 0.08  | 0.30 | 0.747 | 0.996 |
| TNF-R1  | P19438     | 0.24 | 0.32 | 0.396 | 0.504 | 0.51 | 0.08 | 0.011 | 0.075 | 0.34 | 0.43 | 0.377 | 0.535 | 0.80         | 0.26 | 0.049 | 0.136 | 0.57           | 0.29 | 0.108 | 0.325 | 0.54 | 0.44 | 0.222 | 0.512 | 0.43  | 0.36 | 0.228 | 0.47         | 0.07  | 0.48 | 0.850 | 0.981 | -0.41 | 0.69 | 0.489 | 0.853 | -0.29 | 0.51 | 0.501 | 0.996 |
| GRN     | P28799     | 0.24 | 0.24 | 0.285 | 0.425 | 0.39 | 0.04 | 0.006 | 0.054 | 0.32 | 0.17 | 0.115 | 0.304 | 0.90         | 0.26 | 0.041 | 0.136 | 0.47           | 0.22 | 0.092 | 0.325 | 0.42 | 0.39 | 0.265 | 0.512 | 0.35  | 0.35 | 0.294 | 0.482        | 0.05  | 0.35 | 0.847 | 0.981 | -0.27 | 0.54 | 0.556 | 0.853 | -0.01 | 0.43 | 0.987 | 0     |

Supplementary Table S1 (continued)

|                | Uniprot ID | OSM          |      |              |              | LIF   |      |       |              | CT-1         |      |       |       | IL-6+R      |             |              |              | IL-11 + SIL11R |      |       |       | IL-6         |      |       |       | IL-11        |             |              |              | CNTF  |      |       |       | CLC          |             |              |       | IL-27 |      |       |       |
|----------------|------------|--------------|------|--------------|--------------|-------|------|-------|--------------|--------------|------|-------|-------|-------------|-------------|--------------|--------------|----------------|------|-------|-------|--------------|------|-------|-------|--------------|-------------|--------------|--------------|-------|------|-------|-------|--------------|-------------|--------------|-------|-------|------|-------|-------|
|                |            | FC           | SD   | p            | FDR          | FC    | SD   | p     | FDR          | FC           | SD   | p     | FDR   | FC          | SD          | p            | FDR          | FC             | SD   | p     | FDR   | FC           | SD   | p     | FDR   | FC           | SD          | p            | FDR          | FC    | SD   | p     | FDR   | FC           | SD          | p            | FDR   | FC    | SD   | p     | FDR   |
| PDGF subunit A | P04085     | -0.11        | 0.22 | 0.550        | 0.653        | 0.20  | 0.10 | 0.108 | 0.215        | 0.15         | 0.14 | 0.274 | 0.488 | 0.36        | 0.23        | 0.153        | 0.233        | 0.19           | 0.15 | 0.210 | 0.395 | 0.28         | 0.28 | 0.288 | 0.512 | 0.30         | 0.30        | 0.294        | 0.482        | 0.02  | 0.34 | 0.949 | 0.981 | -0.16        | 0.43        | 0.647        | 0.853 | -0.08 | 0.44 | 0.827 | 0.996 |
| ALCAM          | Q13740     | -0.14        | 0.10 | 0.190        | 0.324        | 0.14  | 0.14 | 0.309 | 0.424        | 0.08         | 0.14 | 0.479 | 0.589 | 0.29        | 0.22        | 0.204        | 0.269        | 0.11           | 0.18 | 0.453 | 0.647 | 0.21         | 0.28 | 0.41  | 0.583 | 0.13         | 0.22        | 0.486        | 0.595        | -0.05 | 0.27 | 0.806 | 0.981 | -0.25        | 0.26        | 0.298        | 0.853 | -0.03 | 0.25 | 0.887 | 0.996 |
| U-PAR          | Q03405     | -0.16        | 0.30 | 0.542        | 0.653        | 0.24  | 0.05 | 0.023 | <b>0.095</b> | 0.26         | 0.11 | 0.083 | 0.292 | 0.51        | 0.26        | 0.109        | 0.195        | 0.34           | 0.24 | 0.178 | 0.377 | 0.29         | 0.40 | 0.416 | 0.583 | 0.33         | 0.42        | 0.386        | 0.520        | -0.05 | 0.38 | 0.876 | 0.981 | -0.26        | 0.52        | 0.553        | 0.853 | -0.09 | 0.48 | 0.821 | 0.996 |
| TNFRSF10C      | O14798     | -0.21        | 0.07 | 0.050        | 0.168        | -0.07 | 0.10 | 0.439 | 0.512        | -0.19        | 0.24 | 0.387 | 0.535 | 0.45        | 0.18        | 0.072        | 0.160        | 0.06           | 0.11 | 0.526 | 0.695 | 0.39         | 0.28 | 0.183 | 0.512 | 0.02         | 0.04        | 0.632        | 0.714        | -0.06 | 0.27 | 0.799 | 0.981 | -0.23        | 0.39        | 0.495        | 0.853 | -0.13 | 0.51 | 0.751 | 0.996 |
| TFF3           | Q07654     | -0.23        | 0.13 | 0.124        | 0.249        | -0.02 | 0.23 | 0.911 | 0.911        | -0.14        | 0.14 | 0.297 | 0.488 | 0.46        | 0.15        | 0.048        | 0.136        | 0.00           | 0.16 | 0.997 | 0.997 | 0.33         | 0.30 | 0.260 | 0.512 | 0.05         | 0.34        | 0.858        | 0.884        | -0.01 | 0.24 | 0.961 | 0.981 | -0.09        | 0.41        | 0.780        | 0.853 | -0.10 | 0.33 | 0.721 | 0.996 |
| MMP-2          | P08253     | -0.23        | 0.09 | 0.065        | 0.171        | 0.17  | 0.05 | 0.046 | 0.123        | 0.13         | 0.14 | 0.322 | 0.501 | 0.41        | 0.21        | 0.108        | 0.195        | 0.16           | 0.14 | 0.249 | 0.405 | 0.33         | 0.35 | 0.321 | 0.513 | 0.29         | 0.29        | 0.297        | 0.482        | -0.04 | 0.32 | 0.881 | 0.981 | -0.29        | 0.56        | 0.544        | 0.853 | -0.14 | 0.39 | 0.659 | 0.996 |
| IGFBP-2        | P18065     | -0.24        | 0.31 | 0.390        | 0.504        | 0.28  | 0.13 | 0.097 | 0.200        | 0.2          | 0.32 | 0.473 | 0.589 | <b>0.72</b> | <b>0.42</b> | <b>0.136</b> | <b>0.222</b> | 0.32           | 0.24 | 0.203 | 0.395 | 0.50         | 0.42 | 0.236 | 0.512 | 0.44         | 0.35        | 0.216        | 0.459        | 0.06  | 0.52 | 0.888 | 0.981 | -0.35        | 0.73        | 0.571        | 0.853 | 0.04  | 0.52 | 0.921 | 0.996 |
| PECAM-1        | P16284     | -0.24        | 0.12 | 0.108        | 0.236        | -0.11 | 0.10 | 0.239 | 0.356        | -0.01        | 0.19 | 0.971 | 0.997 | 0.28        | 0.17        | 0.143        | 0.227        | 0.06           | 0.12 | 0.591 | 0.740 | 0.11         | 0.25 | 0.612 | 0.724 | 0.07         | 0.17        | 0.62         | 0.714        | -0.14 | 0.18 | 0.394 | 0.927 | -0.45        | 0.15        | 0.053        | 0.853 | -0.17 | 0.18 | 0.313 | 0.996 |
| CD40           | P25942     | -0.29        | 0.12 | 0.078        | 0.175        | 0.07  | 0.25 | 0.718 | 0.758        | 0.18         | 0.24 | 0.389 | 0.535 | 0.09        | 0.22        | 0.610        | 0.678        | 0.00           | 0.34 | 0.991 | 0.997 | 0.07         | 0.24 | 0.712 | 0.779 | 0.61         | 0.33        | 0.118        | 0.327        | -0.02 | 0.12 | 0.809 | 0.981 | -0.27        | 0.42        | 0.462        | 0.853 | 0.02  | 0.39 | 0.955 | 0.996 |
| CD163          | Q86V87     | -0.30        | 0.12 | 0.073        | 0.171        | -0.22 | 0.19 | 0.247 | 0.361        | -0.4         | 0.23 | 0.131 | 0.315 | 0.05        | 0.20        | 0.763        | 0.797        | -0.34          | 0.17 | 0.099 | 0.325 | -0.05        | 0.34 | 0.847 | 0.899 | <b>-0.62</b> | <b>0.15</b> | <b>0.028</b> | <b>0.252</b> | 0.10  | 0.08 | 0.221 | 0.618 | 0.07         | 0.22        | 0.704        | 0.853 | 0.07  | 0.18 | 0.614 | 0.996 |
| JAM-A          | Q9Y624     | -0.31        | 0.33 | 0.309        | 0.441        | 0.05  | 0.27 | 0.830 | 0.842        | -0.02        | 0.30 | 0.942 | 0.984 | <b>0.73</b> | 0.02        | 0.000        | <b>0.014</b> | 0.01           | 0.15 | 0.949 | 0.977 | 0.26         | 0.26 | 0.294 | 0.512 | 0.08         | 0.20        | 0.612        | 0.714        | -0.27 | 0.38 | 0.425 | 0.954 | -0.44        | 0.33        | 0.205        | 0.853 | -0.12 | 0.31 | 0.635 | 0.996 |
| CST5           | P28325     | -0.33        | 0.38 | 0.351        | 0.491        | -0.16 | 0.33 | 0.572 | 0.626        | -0.16        | 0.45 | 0.660 | 0.757 | 0.08        | 0.07        | 0.255        | 0.319        | -0.35          | 0.20 | 0.130 | 0.325 | 0.12         | 0.23 | 0.535 | 0.668 | 0.16         | 0.55        | 0.711        | 0.754        | 0.21  | 0.07 | 0.048 | 0.241 | -0.06        | 0.22        | 0.754        | 0.853 | 0.08  | 0.36 | 0.776 | 0.996 |
| PD-L1          | Q9NZQ7     | -0.33        | 0.27 | 0.221        | 0.352        | 0.24  | 0.15 | 0.151 | 0.258        | 0.22         | 0.14 | 0.146 | 0.322 | 0.08        | 0.22        | 0.649        | 0.709        | 0.15           | 0.44 | 0.675 | 0.801 | 0.06         | 0.20 | 0.697 | 0.779 | <b>0.67</b>  | <b>0.21</b> | 0.048        | 0.252        | 0.16  | 0.02 | 0.007 | 0.148 | 0.05         | 0.11        | 0.576        | 0.853 | 0.05  | 0.47 | 0.884 | 0.996 |
| LDL receptor   | P01130     | -0.40        | 0.06 | 0.010        | <b>0.087</b> | -0.03 | 0.05 | 0.486 | 0.540        | -0.11        | 0.39 | 0.726 | 0.806 | 0.13        | 0.12        | 0.254        | 0.319        | -0.23          | 0.19 | 0.217 | 0.395 | 0.23         | 0.19 | 0.235 | 0.512 | -0.11        | 0.19        | 0.493        | 0.595        | -0.04 | 0.47 | 0.926 | 0.981 | 0.02         | 0.52        | 0.969        | 0.969 | 0.00  | 0.44 | 0.996 | 0.996 |
| IL8            | P10145     | -0.40        | 0.36 | 0.256        | 0.397        | 0.02  | 0.08 | 0.796 | 0.819        | 0.02         | 0.09 | 0.760 | 0.819 | -0.29       | 0.21        | 0.187        | 0.256        | -0.22          | 0.18 | 0.232 | 0.405 | -0.01        | 0.11 | 0.946 | 0.946 | 0.45         | 0.33        | 0.187        | 0.409        | 0.05  | 0.11 | 0.570 | 0.981 | -0.10        | 0.15        | 0.468        | 0.853 | -0.05 | 0.45 | 0.900 | 0.996 |
| IL-6RA         | P08887     | -0.41        | 0.23 | 0.133        | 0.258        | -0.15 | 0.13 | 0.255 | 0.364        | 0.00         | 0.13 | 0.994 | 0.997 | -           | -           | -            | -            | 0.04           | 0.22 | 0.813 | 0.907 | 0.03         | 0.41 | 0.935 | 0.946 | -0.03        | 0.39        | 0.924        | 0.938        | -0.11 | 0.38 | 0.723 | 0.981 | -0.37        | 0.88        | 0.610        | 0.853 | -0.18 | 0.30 | 0.495 | 0.996 |
| PAI            | P05121     | -0.48        | 0.19 | 0.071        | 0.171        | 0.15  | 0.08 | 0.110 | 0.215        | 0.10         | 0.11 | 0.304 | 0.488 | 0.19        | 0.14        | 0.201        | 0.269        | 0.10           | 0.12 | 0.387 | 0.603 | 0.20         | 0.20 | 0.300 | 0.512 | 0.28         | 0.30        | 0.315        | 0.489        | 0.03  | 0.13 | 0.782 | 0.981 | -0.16        | 0.29        | 0.523        | 0.853 | 0.00  | 0.15 | 0.990 | 0.996 |
| MMP-10         | P09238     | <b>-0.60</b> | 0.44 | 0.189        | 0.324        | 0.19  | 0.25 | 0.399 | 0.484        | 0.11         | 0.16 | 0.429 | 0.577 | -0.37       | 0.35        | 0.271        | 0.333        | -0.32          | 0.47 | 0.436 | 0.636 | 0.12         | 0.27 | 0.586 | 0.708 | <b>0.71</b>  | <b>0.21</b> | 0.042        | 0.252        | 0.21  | 0.05 | 0.027 | 0.215 | -0.08        | 0.36        | 0.783        | 0.853 | 0.17  | 0.52 | 0.694 | 0.996 |
| 4E-BP1         | Q13541     | -0.69        | 0.10 | 0.011        | <b>0.087</b> | -0.19 | 0.66 | 0.726 | 0.758        | 0.00         | 0.80 | 0.997 | 0.997 | -0.44       | 0.38        | 0.236        | 0.306        | 0.16           | 0.92 | 0.826 | 0.907 | <b>-0.99</b> | 1.05 | 0.314 | 0.513 | 0.55         | 0.88        | 0.467        | 0.593        | -0.53 | 0.64 | 0.361 | 0.903 | -0.49        | 0.76        | 0.461        | 0.853 | -0.28 | 0.79 | 0.663 | 0.996 |
| STAMBP         | O95630     | -0.72        | 0.54 | 0.203        | 0.330        | -0.46 | 0.71 | 0.454 | 0.521        | -0.50        | 0.80 | 0.470 | 0.589 | -0.20       | 0.26        | 0.399        | 0.466        | -0.40          | 0.80 | 0.556 | 0.721 | -0.30        | 0.43 | 0.434 | 0.595 | -0.21        | 0.69        | 0.708        | 0.754        | -0.08 | 0.27 | 0.701 | 0.981 | 0.04         | 0.23        | 0.824        | 0.871 | -0.01 | 0.35 | 0.961 | 0.996 |
| t-PA           | P00750     | -0.79        | 0.48 | 0.145        | 0.275        | 0.16  | 0.23 | 0.421 | 0.499        | 0.06         | 0.33 | 0.833 | 0.883 | 0.35        | 0.37        | 0.311        | 0.375        | 0.11           | 0.41 | 0.734 | 0.856 | 0.38         | 0.48 | 0.373 | 0.544 | 0.36         | 0.55        | 0.449        | 0.593        | -0.02 | 0.49 | 0.969 | 0.981 | -0.43        | 0.76        | 0.503        | 0.853 | -0.05 | 0.62 | 0.920 | 0.996 |
| CSTB           | P04080     | <b>-0.82</b> | 0.24 | 0.041        | 0.145        | -0.25 | 0.25 | 0.298 | 0.417        | -0.29        | 0.30 | 0.307 | 0.488 | 0.35        | 0.15        | 0.080        | 0.163        | -0.17          | 0.14 | 0.220 | 0.395 | -0.03        | 0.38 | 0.922 | 0.946 | -0.12        | 0.35        | 0.670        | 0.733        | -0.36 | 0.10 | 0.039 | 0.241 | -0.41        | 0.41        | 0.292        | 0.853 | 0.05  | 0.21 | 0.759 | 0.996 |
| CASP-3         | P42574     | -0.86        | 0.15 | 0.014        | <b>0.087</b> | -0.28 | 0.33 | 0.359 | 0.467        | -0.27        | 0.35 | 0.390 | 0.535 | 0.08        | 0.22        | 0.667        | 0.718        | -0.02          | 0.13 | 0.844 | 0.909 | -0.35        | 0.74 | 0.568 | 0.698 | 0.09         | 0.50        | 0.831        | 0.868        | -0.56 | 0.07 | 0.007 | 0.148 | <b>-0.59</b> | <b>0.39</b> | <b>0.166</b> | 0.853 | -0.30 | 0.28 | 0.270 | 0.996 |
| uPA            | P00749     | -0.91        | 0.35 | 0.068        | 0.171        | -0.05 | 0.06 | 0.360 | 0.467        | -0.08        | 0.07 | 0.253 | 0.466 | -0.22       | 0.15        | 0.169        | 0.247        | -0.26          | 0.23 | 0.242 | 0.405 | 0.03         | 0.30 | 0.914 | 0.946 | 0.41         | 0.35        | 0.239        | 0.479        | -0.11 | 0.15 | 0.397 | 0.927 | -0.35        | 0.31        | 0.257        | 0.853 | 0.00  | 0.39 | 0.990 | 0.996 |
| ADA            | P00813     | -0.93        | 0.02 | 0.000        | <b>0.016</b> | -0.14 | 0.46 | 0.701 | 0.755        | -0.12        | 0.43 | 0.736 | 0.806 | -0.37       | 0.15        | 0.073        | 0.160        | -0.22          | 0.40 | 0.519 | 0.695 | -0.44        | 0.40 | 0.264 | 0.512 | 0.43         | 0.51        | 0.359        | 0.509        | -0.38 | 0.60 | 0.465 | 0.981 | -0.55        | 0.57        | 0.307        | 0.853 | -0.24 | 0.72 | 0.686 | 0.996 |
| AXL            | P30530     | -0.96        | 0.38 | 0.070        | 0.171        | 0.14  | 0.16 | 0.335 | 0.450        | 0.06         | 0.24 | 0.737 | 0.806 | 0.02        | 0.36        | 0.942        | 0.942        | 0.01           | 0.25 | 0.947 | 0.977 | 0.25         | 0.45 | 0.504 | 0.641 | 0.31         | 0.49        | 0.465        | 0.593        | 0.09  | 0.39 | 0.766 | 0.981 | -0.24        | 0.55        | 0.604        | 0.853 | -0.03 | 0.48 | 0.937 | 0.996 |
| FABP4          | P15090     | <b>-1.12</b> | 0.40 | <b>0.059</b> | <b>0.171</b> | -0.43 | 0.18 | 0.079 | 0.168        | <b>-0.67</b> | 0.40 | 0.143 | 0.322 | -0.08       | 0.16        | 0.534        | 0.612        | -0.25          | 0.34 | 0.415 | 0.631 | 0.06         | 0.19 | 0.702 | 0.779 | 0.00         | 0.09        | 0.992        | 0.992        | -0.49 | 0.19 | 0.068 | 0.316 | <b>-0.61</b> | <b>0.53</b> | <b>0.242</b> | 0.853 | -0.02 | 0.12 | 0.847 | 0.996 |
| CCL20          | P78556     | <b>-1.42</b> | 0.26 | <b>0.016</b> | <b>0.087</b> | -0.80 | 0.60 | 0.201 | 0.312        | -0.53        | 0.61 | 0.344 | 0.52  | -0.37       | 0.03        | 0.004        | <b>0.046</b> | -0.75          | 0.65 | 0.244 | 0.405 | -0.20        | 0.17 | 0.247 | 0.512 | 0.31         | 0.19        | 0.144        | 0.327        | 0.07  | 0.32 | 0.793 | 0.981 | 0.11         | 0.32        | 0.671        | 0.853 | 0.25  | 0.27 | 0.331 | 0.996 |

Supplementary Table S2

|      | Enriched Function           | p-value for enrichment | Regulated proteins that enriched the function                                                 | # Molecules |
|------|-----------------------------|------------------------|-----------------------------------------------------------------------------------------------|-------------|
| OSM  | Activation of phagocytes    | 6,69E-11               | MCP-1,CCL20,MCP-3,MCP-2,CSF-1,CXCL5,HGF,IL6,TRAIL                                             | 9           |
|      | Angiogenesis/Vasculogenesis | 7,60E-08               | ADA,CASP-3,MCP-1,MCP-3,CSF-1,CXCL5,HGF,IGFBP-1,IL6,TRAIL                                      | 10          |
|      | Binding                     | 2,90E-08               | CCL15,MCP-1,CXCL11,HGF,IGFBP-1,IL6                                                            | 6           |
|      | Branching of cells          | 7,55E-05               | CASP-3,MCP-1,4E-BP1,HGF,IL6                                                                   | 5           |
|      | Cell movement               | 2,98E-13               | ADA,CCL15,MCP-1,CCL20,CCL23,MCP-3,MCP-2,CSF-1,CXCL11,CXCL5,HGF,IL6,TRAIL                      | 13          |
|      | Cell proliferation          | 3,20E-06               | MCP-1,CSF-1,4E-BP1,HGF,IGFBP-1,IL6,TRAIL                                                      | 7           |
|      | Chemotaxis                  | 3,26E-12               | CCL15,MCP-1,CCL20,CCL23,MCP-3,MCP-2,CSF-1,CXCL11,CXCL5,HGF,IL6                                | 11          |
|      | Differentiation             | 2,40E-06               | MCP-1,CSF-1,HGF,IL6,TRAIL                                                                     | 5           |
|      | Endocytosis                 | 4,83E-05               | MCP-3,CSF-1,HGF,IL6,TRAIL                                                                     | 5           |
|      | Growth                      | 8,85E-06               | MCP-1,CSF-1,CXCL5,4E-BP1,HGF,IL6                                                              | 6           |
|      | Invasion                    | 1,62E-06               | CASP-3,MCP-1,CSF-1,CXCL11,CXCL5,4E-BP1,HGF,IL6,TRAIL                                          | 9           |
|      | Migration                   | 8,95E-12               | TR-AP,ADA,CCL15,MCP-1,CCL20,CCL23,MCP-3,MCP-2,CSF-1,CXCL11,CXCL5,4E-BP1,HGF,IGFBP-1,IL6,TRAIL | 16          |
|      | Recruitment                 | 9,98E-13               | CCL15,MCP-1,CCL20,CCL23,MCP-3,CSF-1,CXCL11,CXCL5,HGF,IL6                                      | 10          |
|      | Stimulation                 | 6,51E-14               | MCP-1,CCL20,MCP-3,CSF-1,CXCL11,CXCL5,HGF,IL6,TRAIL                                            | 9           |
| LIF  | Adhesion                    | 1,18E-10               | MCP-3,CSF-1,CXCL11,HGF,IL6,LAP TGF-beta-1,OPG,TWEAK                                           | 8           |
|      | Angiogenesis/Vasculogenesis | 6,06E-08               | MCP-3,CSF-1,CXCL5,HGF,IGFBP7,IL6,LAP TGF-beta-1,TRAIL,TWEAK                                   | 9           |
|      | Attraction                  | 7,89E-09               | MCP-3,CSF-1,CXCL11,CXCL5,LAP TGF-beta-1                                                       | 5           |
|      | Binding                     | 3,79E-12               | MCP-3,CSF-1,CXCL11,HGF,IL-18R1,IL6,LAP TGF-beta-1,OPG,TWEAK                                   | 9           |
|      | Cell movement               | 4,65E-12               | CCL23,MCP-3,CSF-1,CXCL11,CXCL5,HGF,IL6,LAP TGF-beta-1,OPG,TRAIL,TWEAK                         | 11          |
|      | Cell proliferation          | 1,20E-10               | CSF-1,HGF,IGFBP7,IL6,LAP TGF-beta-1,OPG,TRAIL,TWEAK                                           | 8           |
|      | Chemotaxis                  | 6,98E-09               | CCL23,MCP-3,CSF-1,CXCL11,CXCL5,HGF,IL6,LAP TGF-beta-1                                         | 8           |
|      | Development of vasculature  | 6,77E-09               | MCP-3,CSF-1,CXCL5,HGF,IGFBP7,IL6,LAP TGF-beta-1,OPG,TRAIL,TWEAK                               | 10          |
|      | Differentiation             | 5,84E-07               | CSF-1,HGF,IL6,LAP TGF-beta-1,TRAIL                                                            | 5           |
|      | Endocytosis                 | 4,36E-07               | MCP-3,CSF-1,HGF,IL6,LAP TGF-beta-1,TRAIL                                                      | 6           |
|      | Mobilization of Ca2+        | 2,85E-06               | CCL23,MCP-3,CXCL5,IL6,LAP TGF-beta-1                                                          | 5           |
|      | Formation                   | 1,32E-07               | MCP-3,HGF,IL6,LAP TGF-beta-1,TRAIL                                                            | 5           |
|      | Induction                   | 2,06E-10               | CSF-1,HGF,IL-18R1,IL6,LAP TGF-beta-1,TRAIL                                                    | 6           |
|      | Invasion                    | 1,00E-08               | CSF-1,CXCL5,HGF,IL6,LAP TGF-beta-1                                                            | 5           |
| CT-1 | Migration                   | 2,75E-10               | TR-AP,CCL23,MCP-3,CSF-1,CXCL11,CXCL5,HGF,IGFBP7,IL6,LAP TGF-beta-1,OPG,TRAIL,TWEAK            | 13          |
|      | Recruitment                 | 2,22E-12               | CCL23,MCP-3,CSF-1,CXCL11,CXCL5,HGF,IL6,LAP TGF-beta-1,TWEAK                                   | 9           |
|      | Stimulation                 | 2,78E-15               | MCP-3,CSF-1,CXCL11,CXCL5,HGF,IL-18R1,IL6,LAP TGF-beta-1,TRAIL                                 | 9           |
|      | Adhesion                    | 5,15E-11               | MCP-3,CSF-1,CXCL11,HGF,IL6,LAP TGF-beta-1,OPG,TWEAK                                           | 8           |
|      | Angiogenesis/Vasculogenesis | 2,42E-06               | MCP-3,CSF-1,HGF,IL6,LAP TGF-beta-1,TRAIL,TWEAK                                                | 7           |
|      | Binding                     | 1,38E-12               | MCP-3,CSF-1,CXCL11,HGF,IL-18R1,IL6,LAP TGF-beta-1,OPG,TWEAK                                   | 9           |
|      | Cell movement               | 1,05E-12               | CCL23,MCP-3,CDCP1,CSF-1,CXCL11,HGF,IL6,LAP TGF-beta-1,OPG,TRAIL,TWEAK                         | 11          |
|      | Cell proliferation          | 3,22E-09               | CSF-1,HGF,IL6,LAP TGF-beta-1,OPG,TRAIL,TWEAK                                                  | 7           |
|      | Chemotaxis                  | 3,09E-09               | CCL23,MCP-3,CDCP1,CSF-1,CXCL11,HGF,IL6,LAP TGF-beta-1                                         | 8           |
|      | Development of vasculature  | 1,32E-06               | MCP-3,CSF-1,HGF,IL6,LAP TGF-beta-1,OPG,TRAIL,TWEAK                                            | 8           |
|      | Differentiation             | 3,79E-07               | CSF-1,HGF,IL6,LAP TGF-beta-1,TRAIL                                                            | 5           |
|      | Endocytosis                 | 2,54E-07               | MCP-3,CSF-1,HGF,IL6,LAP TGF-beta-1,TRAIL                                                      | 6           |
|      | Formation                   | 8,53E-08               | MCP-3,HGF,IL6,LAP TGF-beta-1,TRAIL                                                            | 5           |
|      | Induction                   | 1,18E-10               | CSF-1,HGF,IL-18R1,IL6,LAP TGF-beta-1,TRAIL                                                    | 6           |
|      | Invasion                    | 1,32E-05               | CDCP1,CSF-1,CXCL11,HGF,IL6,LAP TGF-beta-1,TRAIL                                               | 7           |
| CT-1 | Migration                   | 1,68E-09               | TR-AP,CCL23,MCP-3,CDCP1,CSF-1,CXCL11,HGF,IL6,LAP TGF-beta-1,OPG,TRAIL,TWEAK                   | 12          |
|      | Recruitment                 | 6,54E-11               | CCL23,MCP-3,CSF-1,CXCL11,HGF,IL6,LAP TGF-beta-1,TWEAK                                         | 8           |
|      | Stimulation                 | 1,74E-13               | MCP-3,CSF-1,CXCL11,HGF,IL-18R1,IL6,LAP TGF-beta-1,TRAIL                                       | 8           |

Supplementary Table S2 (continued)

|                                 | Enriched Function           | p-value for enrichment | Regulated proteins that enriched the function                                                                 | # Molecules |
|---------------------------------|-----------------------------|------------------------|---------------------------------------------------------------------------------------------------------------|-------------|
| <b>IL-6</b><br><b>+sIL-6R</b>   | Angiogenesis/Vasculogenesis | 4,12E-09               | MCP-1,MCP-3,CSF-1,CXCL5,JAM-A,GRN,HGF,IGFBP-1,IGFBP7,TNF-R1,TRAIL                                             | 11          |
|                                 | Attraction                  | 3,71E-10               | MCP-1,MCP-3,CSF-1,CXCL11,CXCL16,CXCL5                                                                         | 6           |
|                                 | Cell death                  | 6,40E-06               | CSF-1,CXCL11,GDF15,HGF,OPG,TRAIL                                                                              | 6           |
|                                 | Cell movement               | 9,52E-17               | MCP-1,CCL23,MCP-3,CSF-1,CXCL11,CXCL16,CXCL5,JAM-A,GDF15,GRN,HGF,IL-15RA,OPG,TNF-R1,TRAIL                      | 15          |
|                                 | Cell proliferation          | 1,62E-09               | MCP-1,CSF-1,GRN,HGF,IGFBP7,OPG,TNF-R1,TRAIL                                                                   | 8           |
|                                 | Chemotaxis                  | 1,22E-10               | MCP-1,CCL23,MCP-3,CSF-1,CXCL11,CXCL16,CXCL5,GRN,HGF,TNF-R1                                                    | 10          |
|                                 | Development of vasculature  | 6,62E-10               | MCP-1,MCP-3,CSF-1,CXCL5,JAM-A,GRN,HGF,IGFBP-1,IGFBP7,OPG,TNF-R1,TRAIL                                         | 12          |
|                                 | Differentiation             | 2,40E-06               | MCP-1,CSF-1,HGF,TNF-R1,TRAIL                                                                                  | 5           |
|                                 | Endocytosis                 | 4,61E-05               | MCP-3,CSF-1,GRN,HGF,TNF-R1,TRAIL                                                                              | 6           |
|                                 | Invasion                    | 1,62E-06               | MCP-1,CSF-1,CXCL11,CXCL5,JAM-A,GDF15,GRN,HGF,TRAIL                                                            | 9           |
|                                 | Migration                   | 1,83E-15               | TR-AP,MCP-1,CCL23,MCP-3,CSF-1,CXCL11,CXCL16,CXCL5,JAM-A,GDF15,GRN,HGF,IGFBP-1,IGFBP7,IL-15RA,OPG,TNF-R1,TRAIL | 18          |
|                                 | Mobilization of Ca2+        | 7,24E-07               | MCP-1,CCL23,MCP-3,CXCL11,CXCL16,CXCL5                                                                         | 6           |
|                                 | Organization                | 2,23E-05               | MCP-1,MCP-3,CSF-1,JAM-A,GDF15,GRN,HGF,TNF-R1,TRAIL                                                            | 9           |
|                                 | Proliferation               | 3,64E-08               | MCP-1,CSF-1,JAM-A,GRN,HGF,IGFBP-1,TRAIL                                                                       | 7           |
|                                 | Recruitment                 | 1,74E-07               | MCP-1,CCL23,MCP-3,CSF-1,CXCL5,TNF-R1                                                                          | 6           |
|                                 | Stimulation                 | 3,97E-10               | MCP-1,MCP-3,CSF-1,CXCL11,CXCL5,HGF,TRAIL                                                                      | 7           |
|                                 | Synthesis of lipid          | 2,71E-05               | MCP-1,CSF-1,GDF15,HGF,IGFBP7,TNF-R1,TRAIL                                                                     | 7           |
| <b>IL-11</b><br><b>+sIL-11R</b> | Angiogenesis/Vasculogenesis | 8,56E-07               | MCP-1,MCP-3,HGF,IGFBP7,IL6,TRAIL                                                                              | 6           |
|                                 | Cell movement               | 5,54E-09               | MCP-1,CCL23,MCP-3,HGF,IL6                                                                                     | 5           |
|                                 | Stimulation                 | 7,00E-09               | MCP-1,MCP-3,HGF,IL6,TRAIL                                                                                     | 5           |
|                                 | Cell proliferation          | 2,44E-07               | MCP-1,HGF,IGFBP7,IL6,TRAIL                                                                                    | 5           |
|                                 | Migration                   | 2,84E-07               | TR-AP,MCP-1,CCL23,MCP-3,HGF,IGFBP7,IL6,TRAIL                                                                  | 8           |
|                                 | Chemotaxis                  | 3,12E-06               | MCP-1,CCL23,MCP-3,HGF,IL6                                                                                     | 5           |
|                                 | Synthesis of lipid          | 2,38E-05               | MCP-1,HGF,IGFBP7,IL6,TRAIL                                                                                    | 5           |
| <b>IL-6</b>                     | Homeostasis                 | 5,15E-05               | MCP-1,CCL23,MCP-3,HGF,IL6,TRAIL                                                                               | 6           |
|                                 | Chemotaxis                  | 6,10E-08               | CCL23,MCP-3,CXCL11,CXCL5,HGF                                                                                  | 5           |
| <b>IL-11</b>                    | Cell movement               | 2,26E-06               | CCL23,MCP-3,CXCL11,CXCL5,HGF                                                                                  | 5           |
|                                 | Adhesion                    | 6,34E-10               | MCP-3,CSF-1,CXCL11,HGF,LAP TGF-beta-1,OPG,TRANCE                                                              | 7           |
|                                 | Cell movement               | 3,14E-06               | CCL23,MCP-3,CSF-1,CXCL11,HGF,LAP TGF-beta-1,OPG                                                               | 7           |
|                                 | Cell proliferation          | 1,91E-06               | CSF-1,HGF,LAP TGF-beta-1,OPG,TRANCE                                                                           | 5           |
|                                 | Chemotaxis                  | 2,29E-08               | CCL23,MCP-3,CSF-1,CXCL11,HGF,LAP TGF-beta-1,TRANCE                                                            | 7           |
|                                 | Formation                   | 2,39E-06               | MCP-3,HGF,LAP TGF-beta-1,TRANCE                                                                               | 4           |
|                                 | Invasion                    | 2,90E-06               | PD-L1,CSF-1,CXCL11,HGF,MMP-10,LAP TGF-beta-1,TRANCE                                                           | 7           |
|                                 | Metastasis                  | 2,34E-06               | PD-L1,CSF-1,HGF,MMP-10,LAP TGF-beta-1,OPG,TRANCE                                                              | 7           |
| <b>IL-11</b>                    | Migration                   | 2,14E-05               | MCP-3,CSF-1,CXCL11,HGF,LAP TGF-beta-1,OPG                                                                     | 6           |
